# Supplementary material for: Fuzzy inference rule based task offloading model (FI-RBTOM) for edge computing
Source: PeerJ Comput Sci. 2025 Mar 28;11:e2657. doi: 10.7717/peerj-cs.2657 (PMC12190490; doi:10.7717/peerj-cs.2657)
Supplement: Supplemental Information 2 [file peerj-cs-11-2657-s002.xlsx]

## Sheet: Sheet1
B/W	CPU Utization	TS	TL	OutPut
1	1	1	1	16.1
2	2	2	2	17.2
3	2	4	8	13.6
4	4	4	4	19
5	5	5	5	18.8
6	5	4	4	20.5
7	8	9	10	21.9
8	11	8	9	22.6
9	12	13	15	24.3
10	13	14	16	28.8
11	16	18	22	26.7
12	17	19	20	20.19
13	16	17	18	20.19
14	14	16	20	25.7
14	11	13	18	25.4
15	26	28	30	20.19
16	22	26	28	29.5
17	42	43	45	20.19
18	19	30	40	33.4
18	11	12	18	26.8
19	31	33	34	32.6
20	15	15	15	27.6
21	24	28	30	30.4
23	32	25	25	31.2
24	34	44	46	39.1
24	24	25	29	30.2
25	32	33	37	33
26	25	24	23	29.7
26	29	32	78	44
27	28	29	30	30.9
27	35	45	55	43.8
28	25	29	40	34.5
28	21	29	38	32.8
29	30	40	60	43.8
30	39	36	40	35.1
30	60	90	100	64.8
29	20	30	40	20.19
31	42	43	44	20.19
31	13	14	15	20.19
32	15	17	18	20.19
33	20	21	25	20.19
34	35	45	67	43.6
35	98	76	88	68.1
36	25	30	35	32.6
37	15	20	24	32.2
38	45	67	89	44.5
39	35	33	39	34.8
40	40	41	45	38.8
41	38	40	40	36.2
42	42	43	45	37.4
43	41	33	23	36.2
44	45	56	78	44
45	33	23	25	37.9
46	41	45	47	40.4
47	40	30	45	40.2
48	48	47	42	41.3
49	41	48	49	42.3
50	36	39	25	43.9
51	16	19	25	46.2
52	22	32	42	48.8
53	43	47	45	48.4
54	48	49	51	49.6
55	51	52	53	50.8
56	53	58	59	52.1
57	52	51	61	53.2
58	55	56	57	53.9
59	58	59	63	55.2
60	62	63	64	57
61	63	62	65	57.4
62	64	65	66	58.8
63	67	68	69	60.7
64	61	60	70	59.4							.,
65	62	63	71	60.2
66	63	64	72	60.8
67	64	65	73	61.5
68	65	68	76	62.7
69	66	67	75	62.7
70	69	68	76	63.4
71	56	81	45	64.6
73	66	82	54	64.7
75	77	88	34	64.8
76	75	71	70	64.8
77	79	85	32	64.7
78	83	89	78	70.5
79	87	86	54	64.8
80	82	84	87	69.8
81	82	83	84	68.6
82	87	88	89	71.1
83	79	76	77	67.3
84	68	66	67	68.7
85	56	57	58	69.4
86	100	100	98	80
87	99	98	97	78.9
88	89	90	92	73.3
89	98	88	89	78
90	91	92	93	74.1
92	90	91	98	78
93	58	86	89	68.3
94	62	65	69	74.2
95	72	76	78	73.9
96	81	86	89	75.8
97	90	91	92	77.1
98	97	96	95	78.1
100	100	100	100	80
